1 **Amotosalen is a bacterial multidrug efflux pump substrate potentially affecting its**  
2 **pathogen inactivation activity**

3 Alex B. Green<sup>a</sup>, Katelyn E. Zulauf<sup>a,b</sup>, Katherine A. Truelson<sup>a</sup>, Lucius Chiaraviglio<sup>a</sup>, Meng Cui<sup>d</sup>,  
4 Zhemin Zhang<sup>e</sup>, Matthew P. Ware<sup>a</sup>, Willy A. Flegel<sup>c</sup>, Richard L. Haspel<sup>a,b</sup>, Ed Yu<sup>e</sup>, James E  
5 Kirby<sup>a,b,#</sup>

6

7 <sup>a</sup>Department of Pathology, Beth Israel Deaconess Medical Center, Boston, MA, USA

8 <sup>b</sup>Harvard Medical School, Boston, MA, USA

9 <sup>c</sup>Department of Transfusion Medicine, NIH Clinical Center, National Institutes of Health  
10 Bethesda, MD, USA

11 <sup>d</sup>Department of Pharmaceutical Sciences, School of Pharmacy, Bouvé College of Health  
12 Sciences, Northeastern University, Boston, Massachusetts, 02115, USA

13 <sup>e</sup>Department of Pharmacology, Case Western Reserve University Medical Center, Cleveland,  
14 OH, USA

15 **Running Title:** Amotosalen is a bacterial efflux pump substrate

16 #Corresponding Author

17 James E. Kirby

18 Beth Israel Deaconess Medical Center

19 330 Brookline Avenue - YA309

20 Boston, MA 02215

21 [jekirby@bidmc.harvard.edu](mailto:jekirby@bidmc.harvard.edu)

22 Phone: 617-667-3648

23 Fax: 617-667-4533

24

## 25 **Abstract**

26 Pathogen inactivation is a strategy to improve the safety of transfusion products. The Cerus  
27 Intercept technology makes use of a psoralen compound called amotosalen in combination with  
28 UVA light to inactivate bacteria, viruses and protozoa. Psoralens have structural similarity to  
29 bacterial multidrug-efflux pump substrates. As these efflux pumps are often overexpressed in  
30 multidrug-resistant pathogens and with recent reported outbreaks of transfusion-associated sepsis  
31 with *Acinetobacter*, we tested whether contemporary drug-resistant pathogens might show  
32 resistance to amotosalen and other psoralens based on multidrug efflux mechanisms through  
33 microbiological, biophysical and molecular modeling analysis. The main efflux systems in  
34 *Enterobacterales* and *Acinetobacter baumannii*, tripartite RND (resistance-nodulation-cell  
35 division) systems which span the inner and outer membranes of Gram-negative pathogens and  
36 expel antibiotics from the bacterial cytoplasm into the extracellular space, were specifically  
37 examined. We found that amotosalen was an efflux substrate for the TolC-dependent RND  
38 efflux pumps in *E. coli* and the AdeABC efflux pump from *Acinetobacter baumannii*, and that  
39 minimal inhibitory concentrations for contemporary bacterial isolates *in vitro* approached and  
40 exceeded the concentration of amotosalen used in the approved platelet and plasma inactivation  
41 procedures. These findings suggest that otherwise safe and effective inactivation methods should  
42 be further studied to exclude possible gaps in their ability to inactivate contemporary, multidrug-  
43 resistant bacterial pathogens.

44

## 45 **Importance**

46 Pathogen inactivation is a strategy to enhance the safety of transfused blood products. We  
47 identify the compound, amotosalen, widely used for pathogen inactivation, as a bacterial

48 multidrug efflux substrate. Specifically, experiments suggest that amotosalen is pumped out of  
49 bacteria by the major TolC-dependent RND efflux pumps in *E. coli* and the AdeABC efflux  
50 pump in *Acinetobacter baumannii*. Such efflux pumps are often overexpressed in multidrug-  
51 resistant pathogens. Importantly, the minimal inhibitory concentrations for contemporary  
52 multidrug-resistant *Enterobacterales*, *Acinetobacter baumannii*, *Pseudomonas aeruginosa*,  
53 *Burkholderia* spp., and *Stenotrophomonas maltophilia* isolates approached or exceeded the  
54 amotosalen concentration used in approved platelet and plasma inactivation procedures,  
55 potentially as a result of efflux pump activity. Although there are important differences in  
56 methodology between our experiments and blood product pathogen inactivation, these findings  
57 suggest that otherwise safe and effective inactivation methods should be further studied to  
58 exclude possible gaps in their ability to inactivate contemporary, multidrug-resistant bacterial  
59 pathogens.

60

61

## 62 **Introduction**

63 Bacterial contamination of transfusion product is currently the primary transfusion-related  
64 infectious risk (1-3) and is a leading cause of transfusion-related deaths in the United States.  
65 Culture-confirmed sepsis is estimated to occur in a least 1 in 100,000 platelet transfusions  
66 without pathogen reduction technology (4-6). The need for room temperature storage of platelets  
67 contributes to risk by allowing contaminating bacteria to multiply to dangerous levels.

68

69 The majority of bacterial platelet contaminants are Gram-positive skin flora. However, recent  
70 events highlight potential contamination and transfusion-associated infection with Gram-  
71 negative pathogens. In June 2019, the CDC issued a report describing four cases of sepsis  
72 attributed apheresis platelet transfusion. Occurring between the months of May and October,  
73 2018, in Utah, California, and Connecticut, the cases were notable for their identification of  
74 clonal *Acinetobacter calcoaceticus-baumannii complex* isolates (ACBC). One of these occurred  
75 despite use of pathogen reduction technology (7). Following a multi-state investigation, two  
76 additional, clonally distinct cases of ACBC platelet-transfusion-associated sepsis were reported  
77 in North Carolina, and one additional case was reported in Michigan (7). A summary of blood  
78 product contaminants in the United States, the United Kingdom and France published in 2005  
79 found that ~33% of platelet transfusion-associated infections were caused by either  
80 *Enterobacteriales* or *Acinetobacter*; the percentage of transfusion-associated infections caused by  
81 these pathogens in red blood cell products was even higher at 55% (7, 8). A recent study from  
82 the American Red Cross found that *Klebsiella* and *Acinetobacter* spp. were the Gram-negative  
83 pathogens most frequently associated with platelet transfusion-associated sepsis (6).

84

85 Numerous steps have been taken to protect against bacterial contamination risk. In March 2004,  
86 the AABB (previously known as the American Association of Blood Banks) required member  
87 institutions to employ means of identifying and mitigating bacterial contamination of platelet  
88 products (9). In 2010, the AABB's standards were updated to recommend pathogen inactivation  
89 as well (10). In September 2019, the FDA issued non-binding recommendations to blood  
90 collection agencies and transfusion services for pathogen identification, pathogen reduction, and  
91 platelet storage (11). In practice, several protocols are now in use for identifying infected blood  
92 products including single and pooled unit culture assessment, lipoteichoic acid and  
93 lipopolysaccharide antigen detection, and pH-sampling (12-15). Recently, several methods of  
94 pre-emptive pathogen reduction, rather than passive detection, have been developed and utilized.

95

96 In particular, psoralen compounds have compelling attributes for use in pathogen reduction  
97 technologies (16-19) Psoralens are tricyclic, planar compounds capable of forming irreversible,  
98 covalent adducts with nucleic acids following excitation with long-wave ultraviolet light (i.e.,  
99 UVA) (20, 21). Therefore, psoralens can be added to blood products, which are then irradiated to  
100 destroy the nucleic acids of any contaminating pathogens.

101

102 Psoralen compounds vary in their characteristics. For instance, while the psoralen, 8-  
103 methoxypsoralen (8-MOP), has previously been shown to be effective in inactivating many  
104 bacterial species, it is less effective in inactivating viral pathogens (22). In comparison, while 4'-  
105 aminomethyl-4,5',8-trimethylpsoralen (AMT) inactivates both bacterial and viral pathogens, it  
106 exhibits high mutagenicity in the Ames test, a surrogate for carcinogenic potential, and therefore  
107 is considered inappropriate as a blood product treatment (22, 23). An ideal combination of 8-

108 MOP's safety profile and AMT's efficacy was found in 4'-(4-amino-2-oxa)butyl-4,5',8-  
109 trimethylpsoralen (trade name, amotosalen) (22-24). In 2014, the Cerus Corporation's  
110 INTERCEPT Blood System, using amotosalen in conjunction with a specialized UVA  
111 illuminator, became the first psoralen-based pathogen reduction system licensed by the US Food  
112 and Drug Administration for pathogen reduction in platelets (25) and is also now approved for  
113 pathogen reduction in plasma (26).

114

115 Since amotosalen's development, multiple studies have reported its efficacy against a broad  
116 spectrum of microbial pathogens (27-29). In August 2020, a study supported by the Cerus  
117 Corporation also demonstrated inactivation of ACBC and *Staphylococcus saprophyticus* isolated  
118 from the transfusion-related sepsis case mentioned above, which occurred despite use of its  
119 pathogen-reduction technology. The study showed a >5.9-log reduction in viable pathogen for  
120 both isolates after treatment, implying amotosalen susceptibility (30).

121

122 Notably, the tricyclic, planar structure of psoralens, including amotosalen, is reminiscent of  
123 known bacterial multidrug efflux pump substrates (31). Moreover, increased susceptibility of an  
124 *Escherichia coli* *acrA* mutant to 8-methoxypsoralen plus ultraviolet radiation was previously  
125 noted in 1982, prior to the identification of AcrAB-TolC as the major tripartite efflux pump in  
126 *Escherichia coli* (32). With the dramatic emergence of antimicrobial resistance, often associated  
127 with overexpression of such efflux pumps, we therefore considered the possibility that multidrug  
128 efflux resistance present in Gram-negative pathogens may also confer resistance to amotosalen  
129 and related psoralen compounds. To address this possibility, the activity of amotosalen against  
130 contemporary, drug-resistant Gram-negative species most commonly associated with blood

131 product contamination, including *Acinetobacter baumannii*, *Escherichia coli*, and *Klebsiella*  
132 *pneumoniae*, were accordingly characterized. The potential of psoralen to act as substrates for  
133 major multidrug efflux pumps found in these organisms was also assessed.

134

## 135 **Results**

136 Assessment of amotosalen activity against *E. coli*, *K. pneumoniae*, *A. baumannii*, *Pseudomonas*  
137 *aeruginosa* and *Burkholderia* strains was performed using reference standard minimal inhibitor  
138 concentration (MIC) testing. Accordingly, two-fold serial dilutions of amotosalen were prepared  
139 in microwell format, and added to bacteria in standard cation-adjusted Mueller-Hinton broth  
140 under conditions recommended by the Clinical Laboratory Standards Institute (33). Microplates  
141 were exposed to 2 Joules/cm<sup>2</sup> of UVA, to approximate exposure during platelet pathogen  
142 inactivation (17), and incubated overnight to determine the MIC through absorbance  
143 measurements as previously described (34-37).

144

145 Strains tested were from collections of contemporary multidrug-resistant strains and were  
146 generally carbapenem resistant (Table S1). FDA-CDC Antimicrobial Resistance Bank strains are  
147 available as a resource for validation of susceptibility testing methods against new and existing  
148 antimicrobials (38). Amotosalen MIC varied between and within genera (see Table I, Table S1).  
149 Notably, MIC values used in our *in vitro* assay were close to, and for some strains exceeded, the  
150 150 µM concentration of amotosalen used in the Intercept pathogen inactivation procedure in  
151 clinical practice. The modal MICs of multidrug-resistant (MDR) *E. coli* and *K. pneumoniae*  
152 isolates exceeded the MICs of broadly-susceptible ATCC strains .of the same species; however,

153 broadly-susceptible *A. baumannii* 17978 (39) had an MIC of 128  $\mu$ M, identical to the modal  
154 MIC of MDR *A. baumannii* isolates.

155  
156 Based on structural similarity of psoralens to known multidrug-efflux pump substrates and  
157 frequent elevation of efflux pump expression in MDR Gram-negative pathogens (40), we then  
158 examined whether well-characterized, major efflux pumps from *E. coli* and *A. baumannii* were  
159 capable of rendering these strains resistant to psoralen compounds. These pumps are classified as  
160 RND (resistance-nodulation-cell division) efflux pumps and consist of three components,  
161 residing in the inner membrane, periplasm and outer membrane, respectively.

162  
163 We first used a genetics approach to assess effects on psoralen efflux in isogenic strains that  
164 were competent or incompetent for expression of functional *E. coli* RND family efflux pumps. In  
165 *E. coli*, the RND efflux pumps depend on the shared outer membrane channel, TolC (41). We  
166 therefore compared psoralen MICs in an *E. coli* K-12 parent strain and a TolC-knockout ( *$\Delta$ tolC*)  
167 strain that were otherwise genetically identical (i.e., isogenic strains). For amotosalen, 8-MOP  
168 and AMT (see Table II), the MIC in the  *$\Delta$ tolC* strain was reduced by up to 16-fold, indicating  
169 that psoralens are TolC-dependent efflux substrates.

170  
171 The major MDR efflux pump in *A. baumannii* is the RND, AdeABC pump with each of the three  
172 proteins performing analogous roles to those in the tripartite AcrAB-TolC machinery. Multidrug-  
173 resistance in *A. baumannii* and other *Acinetobacter* species is commonly associated with  
174 upregulation of the AdeABC efflux system (42-44). To examine whether AdeABC could efflux  
175 psoralens, we cloned *adeAB* and *adeC* on separate plasmids under control of inducible



176 promoters. These plasmids were then transformed alone or in combination into the *E. coli*  
177 AGX100AX strain, which has deletions in the main RND efflux pumps ( $\Delta acrAB$ ,  $\Delta acrEF$ ) that  
178 partner with TolC in *E. coli*, thereby reducing potentially confounding effects from existing  
179 efflux pumps in the *E. coli* experimental system (45).

180

181 In these strains, we found evidence for pronounced efflux of psoralens, however, only if both the  
182 AdeAB and AdeC plasmids were present (see Table III) and induced in the same strain (data not  
183 shown), demonstrating the requirement for all three RND components. For amotosalen, the  
184 modal MIC of AdeC expressing control strain, with an inoperative pump complex, was found to  
185 be 8  $\mu\text{M}$ , which was comparable with the modal MIC of the AG100AX parent *E. coli* strain. In  
186 contrast, the AdeABC expressing experimental strain, with an operative, induced pump,  
187 exhibited a 32-fold higher modal MIC of 256  $\mu\text{M}$ . This was similar to the high-level resistance  
188 of the multidrug-resistant *A. baumannii* AYE strain from which AdeABC was cloned for use in  
189 these experiments, which had a bimodal MIC of 128  $\mu\text{M}$  and 256  $\mu\text{M}$  across replicate  
190 experiments (Table S1). Although carbapenem-susceptible, AYE is considered a model MDR *A.*  
191 *baumannii* strain and is notable for having caused wide-spread epidemic infection in France with  
192 high mortality (46).

193

194 The AdeB protein is the drug-binding channel and pump, energized by a proton motive force to  
195 move substrates from the bacterial cytoplasm into the periplasm (47). We therefore assessed the  
196 ability of amotosalen to bind purified AdeB using a fluorescence polarization taking advantage  
197 of the inherent fluorescence of amotosalen (see Fig. 1). The dissociation constant ( $K_D$ ) for  
198 binding to AdeB was  $27.9 \pm 1.8 \mu\text{M}$ , in the same range as the 4.9  $\mu\text{M}$   $K_D$  of the efflux pump

199 inhibitor, PA $\beta$ N, for AdeB, and the  $K_D$  of ethidium bromide (8.7  $\mu$ M), proflavin (14.5  $\mu$ M), and  
200 ciprofloxacin (74.1  $\mu$ M) efflux substrates for the homologous, AcrB (31).

201  
202 The previously described cryo-EM structure of AdeB identified a pathway for efflux pump  
203 substrate extrusion with entrance through a cleft in the periplasmic domain and sequential  
204 binding to proximal and distal multidrug-binding sites (47, 48). Computer modeling of the  
205 molecular docking of amotosalen demonstrated binding to both the proximal and distal multidrug  
206 bindings sites within the AdeB periplasm domain (see Fig. 2). AMT and 8-MOP were also found  
207 to dock with the proximal and distal binding sites, and cleft and distal binding sites, respectively  
208 (data not shown). These data are consistent with binding of known efflux substrates to AdeB and  
209 homologous RND pumps (31).

210

## 211 **Discussion**

212 Microbial contamination of blood products remains a critical transfusion safety issue. Numerous  
213 studies have established the use of amotosalen combined with UVA treatment for broad-  
214 spectrum inactivation of bacterial, protozoan, and viral pathogens (27-29, 49-52). Recently, a  
215 case of a septic transfusion reaction was reported with a pathogen-reduced product. While a  
216 follow-up study indicated that the implicated strains were inactivated by amotosalen (30), this  
217 event paired with potential gaps in the existent literature led us to investigate the possibility that  
218 MDR Gram-negative organisms, such as *Acinetobacter baumannii*, may have the potential to  
219 escape pathogen inactivation.

220

221 Gram-negative pathogens in particular are known to have a significant penetration barrier to  
222 antimicrobials based on their double cell membrane along with a plethora of multidrug efflux  
223 pumps that limit access to the bacterial cytoplasm (53). Here we demonstrate that psoralens  
224 including amotosalen are multidrug efflux substrates. It is of interest that the derivation of  
225 amotosalen and AMT included the instillation of a primary amine into an existing planar  
226 structure with low globularity and few rotatable bonds (Fig. 3). These features taken together are  
227 now known to be associated with enhanced penetration of antibiotics across the Gram-negative  
228 membrane barrier (54). Therefore, the increased activity (lower MIC values) of amotosalen and  
229 AMT compared with 8-MOP is fully consistent with our current understanding of antimicrobial  
230 penetrance into Gram-negative pathogens. Nevertheless, access to an intracellular target (in this  
231 case, DNA) is a balance of penetration and efflux, and, based on our data, psoralens including  
232 amotosalen, appear especially vulnerable to efflux.

233  
234 Specifically, amotosalen, AMT, and 8-MOP were found to be substrates for the major efflux  
235 pumps in *Enterobacteriales* and *A. baumannii*. These RND efflux systems, AcrAB-TolC and  
236 AdeABC, respectively, share similar substrate specificity and 50% amino acid identity (55).  
237 Therefore, the finding that both pumps efflux psoralens, manifest as large increases in the MIC  
238 in pump-competent compared with pump-defective strains, is not surprising. Binding of  
239 amotosalen to AdeB showed a micromolar dissociation constant, consistent with known affinities  
240 of antibiotics to RND pumps (31) and MATE family transporters (56). This affinity is likely  
241 located within an optimal dissociation continuum that allows for the ability to bind to several  
242 sites within the pump itself with eventual handoff to the outer membrane pump protein and  
243 release into the extracellular space (47). Molecular docking to the previously determined cryo-

244 EM structure of AdeB suggest that amotosalen binding is consistent with what has been either  
245 determined or predicted for other canonical efflux substrates.

246

247 Notably, both AcrABC and AdeABC are upregulated in resistant pathogens. For example,  
248 *acrABC* is upregulated in *Enterobacter* species resistant to colistin (57); *E. coli* resistant to  
249 multiple antibiotics (58-60); and in drug-resistant *Salmonella* (61, 62) and *Klebsiella* (63, 64).  
250 The expression of *adeABC* is often upregulated in resistant *Acinetobacter* strains (42-44).  
251 Therefore, we would expect resistance to amotosalen to be correspondingly increased in these  
252 strains.

253

254 We found in activity spectrum studies that multidrug-resistant *E. coli*, *K. pneumoniae*, and *A.*  
255 *baumannii* demonstrated varying levels of resistance to amotosalen with a significant fraction of  
256 isolates with MICs exceeding the concentration of amotosalen used in the Intercept pathogen  
257 inactivation procedure. Although we cannot, without extensive genetic and expression analysis,  
258 definitively conclude that higher MIC values in these strains were due to efflux activity alone, it  
259 is reasonable to hypothesize that efflux is a major contributor. Unlike the pan-susceptible ATCC  
260 strains of *E. coli* and *K. pneumoniae* examined, which had low MICs, the otherwise broadly  
261 susceptible *A. baumannii* 19798 is known to express AdeABC and the related AdeFGH and  
262 AdeIJK pumps potentially explaining its higher intrinsic resistance (65).

263

264 We expected that *Pseudomonas aeruginosa*, *Stenotrophomonas maltophilia*, and *Burkholderia*  
265 spp. are to be likely candidates for efflux mediated resistance to psoralens, as these bacteria often  
266 express or overexpress multiple efflux pumps, resulting in characteristic intrinsic resistance to

267 many antibiotics (66-68). In examination of a limited number of strains (five, two, and eight for  
268 these species groups, respectively), we found that they had very high MICs values, often  
269 exceeding 256  $\mu\text{M}$ , the highest concentration of amotosalen tested (see Table S1), as well as the  
270 150  $\mu\text{M}$  concentration used during pathogen inactivation of blood products. In the context of the  
271 current study, however, we did not examine whether this intrinsic resistance was specifically  
272 associated with efflux pump activity, a goal of future work. Interestingly, a minority of strains  
273 were either always or variably killed by UVA light in the absence of amotosalen exposure (Table  
274 S1). Based on prior literature, we speculate this may result from free radical generation during  
275 UVA excitation of bacterial fluorescent pigments and/or endogenous photosensitizers (69, 70).

276

277 Though generally effective against most pathogens, psoralens are ineffective against non-  
278 enveloped viruses such as HAV, HEV, parvovirus B19, and poliovirus, and relatively imporous  
279 bacterial spores (71-73). Taken together, our data now raise the possibility that contemporary  
280 multidrug-resistant bacterial isolates have reduced susceptibility to inactivation based on their  
281 ability to efflux psoralens and thereby avoid UVA-catalyzed nucleic acid damage. Collectively,  
282 our data also suggest the need for further study of psoralen-efflux pump interaction and that  
283 future chemical optimization of pathogen inactivating compounds should specifically explore  
284 Gram-negative penetrance in the presence of efflux pumps.

285

286 Our study has several limitations and results should not be extrapolated directly to the  
287 performance of the Cerus INTERCEPT system. Notably, we did not employ the INTERCEPT  
288 Illuminator for UVA exposure. We also tested inactivation of pathogens in standard  
289 antimicrobial susceptibility testing medium and in lid-less microwell plates with a very short

290 path length for UVA exposure, not in blood products contained in bags with potentially greater  
291 UVA opacity. Therefore, our results may differ from the INTERCEPT system when used  
292 according to manufacturer's specifications. Also, our results should be taken in context. MDR  
293 Gram-negative pathogens thus far are relatively rare causes of transfusion associated sepsis. In  
294 addition, pathogen inactivation strategies have provided significant benefit in reducing the  
295 overall frequency of transfusion-associated blood stream infection (74). Nevertheless, emerging  
296 antimicrobial resistance, including resistance associated with efflux mechanisms, is becoming  
297 increasingly common. Our findings serve as an alert to a potential vulnerability in pathogen  
298 inactivation methods that may explain some instances of pathogen inactivation breakthrough and  
299 should be an area of further research.

300

## 301 **Materials & Methods**

### 302 **Chemicals**

303 Amotosalen HCl 3mM solution was obtained from the Cerus INTERCEPT Blood System for  
304 Platelets Pathogen Reduction System Dual Storage Processing Set and stored in light-protected  
305 aliquots at 4°C. 4'-aminomethyltrioxsalen hydrochloride (AMT) was from Cayman Chemical  
306 (Ann Arbor, MI); 8-methoxypsoralen (8-MOP) was from Sigma-Aldrich (St Louis, MO). 8-MOP  
307 and AMT were dissolved in DMSO and stored as aliquots at -80°C prior to use.

308

### 309 **Bacterial Strains**

310 Clinical bacterial strains are listed in Table S1 and were obtained from the American Type  
311 Culture Collection (ATCC) (Manassas, VA), the CDC-FDA Antimicrobial Resistance Isolate  
312 Bank (ARIB) (Atlanta, GA), Walter Reed Army Institute of Research (WRAIR) (Silver Spring,

313 MD) and BEI Resources (Manassas, VA). The *Keio* strain BW25113, and isogenic, JW5503-  
314 KanS  $\Delta tolC$  *E. coli* were obtained from the Coli Genetics Stock Center (Yale University, New  
315 Haven, CT).(75) *E. coli* AG100AX  $\Delta acrAB$   $\Delta acrEF$ (76) was from Ed Yu (Case Western  
316 University, Cleveland, OH).

317

### 318 **Creation of isogenic AdeABC efflux strains**

319 Vectors for regulated expression of *adeAB* and *adeC* were created as follows: To create the  
320 isopropyl  $\beta$ -D-1-thiogalactopyranoside (IPTG)-inducible, pAdeC vector, pBMTL-2(77) was first  
321 converted to pBMTL-2NTC by replacing the kanamycin resistance gene was with a  
322 nourseothricin acetyltransferase resistance gene. Specifically, pBMTL-2 was amplified by PCR  
323 using "F pLAC (NAT)" and "R pLAC (Nat)" primers (see Table S2), and the nourseothricin  
324 resistance gene was amplified from plasmid pMOD3-mNeptune2-nat (78) (Addgene plasmid  
325 #120335; <http://n2t.net/addgene:120335>; RRID:Addgene 120335) using primers "F Nat" and "R  
326 Nat" with inclusion of 5' tails encoding overlap between vector and nourseothricin amplicons,  
327 respectively. pBMTL-2 was a gift from Ryan Gill (Addgene plasmid # 22812;  
328 <http://n2t.net/addgene:22812>; RRID:Addgene\_22812). All amplification reactions were  
329 performed using Q5 high-fidelity DNA polymerase (New England Biolabs, Beverly, MA). PCR  
330 amplification was followed by DpnI digestion for 60-90 minutes at 37°C. PCR products were  
331 column-purified (Qiaquick PCR Purification kit, Qiagen, Valencia, CA) and assembled using the  
332 HiFi reaction kit (New England Biolabs). Transformants were selected on 50  $\mu$ g/ml  
333 nourseothricin. The *adeC* gene from *A. baumannii* strain AYE (ATCC BAA-1710) was then  
334 similarly amplified from genomic DNA prepared with the Wizard Genomic DNA Extraction Kit  
335 (Promega, Madison, WI) using primers "F AdeC" and "R AdeC" and cloned downstream from

336 the vector pLac site and Shine-Delgarno sequence in pBMTL-2NTC using vector primers, “F  
337 pLAC (AdeC)” and “R pLAC (AdeC)”, with the new vector again assembled using HiFi as  
338 described above.

339

340 To create the arabinose-inducible pAdeAB vector, pBAD-LSSmOrange(79) was amplified using  
341 primers "R pBAD" and "F pBAD" to exclude the existing fluorescent protein. pBAD-  
342 LSSmOrange was a gift from Vladislav Verkhusha (Addgene plasmid # 37129;  
343 <http://n2t.net/addgene:37129>; RRID:Addgene\_37129). *adeAB* genes were amplified from *A.*  
344 *baumannii* AYE genomic DNA, while adding a Shine-Delgarno sequence with optimized  
345 spacing from the start codon using primers "F AdeA" and "R AdeB". Amplicons were assembled  
346 by HiFi.

347

348 Plasmid constructs were confirmed by Sanger sequencing. Vectors, pAdeC and/or pAdeAB,  
349 were introduced into chemically-competent *E. coli* strain AG100AX using the 1X TSS method  
350 (80).

351

### 352 **MIC determination**

353 For MIC determination of ATCC, FDA-CDC ARIB, WRAIR, BEI Resources, and *AtolC*  
354 isogenic strains, bacterial stocks frozen at -80°C were streaked onto tryptic soy agar plates  
355 containing 5% sheep blood (Remel, Lenexa, KS) and grown overnight at 35°C in ambient air.  
356 Colonies were then suspended in 0.9% saline to 0.5 McFarland, measured using a Densicheck  
357 (Biomerieux, Durham, NC); diluted 1:300 in cation-adjusted Mueller-Hinton broth (BD,  
358 Franklin Lakes, NJ); and dispensed with an Integra ASSIST (Integra LifeSciences, Plainsboro



359 Township, NJ) into 384-well polystyrene plates (Greiner Bio-One, Monroe, NC) at 50  $\mu$ L per  
360 well.

361  
362 For MIC determination of AG100AX strains containing pAdeC and pAdeAB plasmids,  $-80^{\circ}\text{C}$   
363 frozen stocks were inoculated directly into non-cation-adjusted Mueller-Hinton broth containing  
364 100  $\mu\text{g/ml}$  ampicillin, 50  $\mu\text{g/ml}$  nourseothricin, 5mM calcium chloride, and 5 mM magnesium  
365 chloride, with or without *adeABC* induction using 1% L-arabinose and 1.0 mM IPTG (Isopropyl  
366  $\beta$ -D-1-thiogalactopyranoside), and grown overnight at  $35^{\circ}\text{C}$  in 15mL conical tubes with  
367 continual rotation. Bacterial cultures were then adjusted to 0.5 McFarland and diluted 1:300 in  
368 the same medium, and dispensed as above into microplates.

369  
370 Filled 384-well plates were centrifuged at 1250 RCF for four minutes to ensure the entire inoculum  
371 was in continuity with the bottom of the well. Then two-fold doubling dilutions of stock solutions of  
372 amotosalen supplemented to 0.3% Tween-20 (Sigma-Aldrich), AMT, or 8-MOP were dispensed  
373 into microwells using the HP D300 digital dispensing system (HP, Inc. Palo Alto, CA), as previously  
374 described,(34-37) and the microplates were mixed for 5 minutes on a microplate shaker to ensure  
375 complete mixing of psoralens with the inoculum. Microplates were then exposed to ultraviolet light  
376 in a UV Stratalinker 1800 (Stratagene, La Jolla, CA), retrofitted with UV BL F8T5 CFL 12-inch  
377 UVA 365nm Blacklight Bulbs (Coolspider, Jiinyun, China) and calibrated according to  
378 manufacturer's instructions with an UVA365 UV Light Meter (Amtast, Lakeland, FL).

379  
380 After incubation at  $35^{\circ}\text{C}$  for 20 h, the  $A_{600}$  of the microplate was measured using a TECAN  
381 M1000 microplate reader. Minimal inhibitory concentration was determined based on a growth  
382 inhibition  $A_{600}$  cutoff of 0.06, consistent with our prior determination of absorbance cutoffs for

383 accurate MIC determinations in 384-well plate format (35, 37, 81). Notably, the AdeABC pump  
384 was inactive in *E. coli* AG100X in Mueller-Hinton broth without the addition of divalent cations,  
385 consistent with prior use of magnesium supplementation when expressing this *A. baumannii*  
386 efflux pump in *E. coli* (82). The concentrations of MgCl<sub>2</sub> and CaCl<sub>2</sub> used were empirically  
387 determined to be optimal for efflux of minocycline and ethidium bromide (data not shown).

388

### 389 **AdeB binding affinity and molecular docking**

390 His-tagged AdeB protein was purified as described previously (31). Fluorescence polarization assays  
391 were performed in a ligand binding solution consisting of 20 mM HEPES-NaOH pH7.5 and 0.05%  
392 n-dodecyl- $\beta$ -D-maltoside (DDM) and 3  $\mu$ M amotosalen. The experiments were done by titrating the  
393 AdeB protein in solution containing 20 mM HEPES-NaOH pH7.5 and 0.05% DDM into the ligand  
394 binding solution while keeping DDM concentration constant. Fluorescent polarization was measured  
395 at 25°C using a PerkinElmer LS55 spectrofluorometer coupled with a Hamamatsu R928  
396 photomultiplier. The excitation wavelength for amotosalen was 350 nm and the fluorescent  
397 polarization signal ( $\Delta P$ ) was measured at 470 nm. Titration data points represent 15 measurements  
398 and 3 biological replicates were performed to determine the  $K_D$  as previously described (31).  
399 ORIGIN Version 7.5 (OriginLab Corp., Northampton, MA) was used for curve fitting.

400

### 401 **Molecular Docking**

402 A structure of the “binding” protomer of AdeB-Et-I (PDB ID: 7KGH) was used to as the template, in  
403 which the bound Et ligands were removed from the protomer (48). The Protein Preparation Wizard  
404 Module of Maestro (Release 2019-3) (Schrödinger, New York, NY) was used for induced-fit-  
405 docking simulations<sup>46</sup> using default parameters to predict binding modes of amotosalen, AMT, and 8-  
406 MOP to AdeB. For each calculation, residues within 5Å of the bound ligand were selected for side

407 chain optimization using Prime refinement. The docking results with the lowest XP scores were  
408 selected as predicted poses.

409

## 410 **Acknowledgements**

411 This work was supported by R01AI145069 to E. Yu and R21AI146485 to J.E.K. K.E.Z. was  
412 supported in part by a National Institute of Allergy and Infectious Diseases training grant  
413 (T32AI007061). W.A.F. was supported by a NIH Clinical Center Intramural Research Program  
414 grant (ZIA CL002128). The content is solely the responsibility of the authors and does not  
415 necessarily represent the view of the National Institutes of Health, the Department of Health and  
416 Human Services, or the U.S. Federal Government. The HP D300 digital dispenser and TECAN  
417 M1000 used in experiments were provided by TECAN (Morrisville, NC). TECAN had no role in  
418 study design, data collection/interpretation, manuscript preparation, or decision to publish.

## 419 **References**

- 420 1. Atreya C, Glynn S, Busch M, Kleinman S, Snyder E, Rutter S, AuBuchon J, Flegel W,  
421 Reeve D, Devine D, Cohn C, Custer B, Goodrich R, Benjamin RJ, Razatos A, Cancelas J,  
422 Wagner S, Maclean M, Gelderman M, Cap A, Ness P. 2019. Proceedings of the Food and  
423 Drug Administration public workshop on pathogen reduction technologies for blood  
424 safety 2018 (Commentary, p. 3026). *Transfusion* 59:3002-3025.
- 425 2. Chiu EK, Yuen KY, Lie AK, Liang R, Lau YL, Lee AC, Kwong YL, Wong S, Ng MH,  
426 Chan TK. 1994. A prospective study of symptomatic bacteremia following platelet  
427 transfusion and of its management. *Transfusion* 34:950-4.
- 428 3. Morrow JF, Braine HG, Kickler TS, Ness PM, Dick JD, Fuller AK. 1991. Septic  
429 reactions to platelet transfusions. A persistent problem. *JAMA* 266:555-8.
- 430 4. United States Centers for Disease Control and Prevention. Bacterial contamination of  
431 platelets. <https://www.cdc.gov/bloodsafety/bbp/bacterial-contamination-of-platelets.html>.  
432 Accessed October 30, 2020.
- 433 5. Haass KA, Sapiano MRP, Savinkina A, Kuehnert MJ, Basavaraju SV. 2019. Transfusion-  
434 transmitted infections reported to the national healthcare safety network hemovigilance  
435 module. *Transfus Med Rev* 33:84-91.
- 436 6. Eder AF, Dy BA, DeMerse B, Wagner SJ, Stramer SL, O'Neill EM, Herron RM. 2017.  
437 Apheresis technology correlates with bacterial contamination of platelets and reported  
438 septic transfusion reactions. *Transfusion* 57:2969-2976.
- 439 7. Jones SA, Jones JM, Leung V, Nakashima AK, Oakeson KF, Smith AR, Hunter R, Kim  
440 JJ, Cumming M, McHale E, Young PP, Fridey JL, Kelley WE, Stramer SL, Wagner SJ,  
441 West FB, Herron R, Snyder E, Hendrickson JE, Peaper DR, Gundlapalli AV, Langelier

- 442 C, Miller S, Nambiar A, Moayeri M, Kamm J, Moulton-Meissner H, Annambhotla P,  
443 Gable P, McAllister GA, Breaker E, Sula E, Halpin AL, Basavaraju SV. 2019. Sepsis  
444 attributed to bacterial contamination of platelets associated with a potential common  
445 source - multiple states, 2018. *MMWR Morb Mortal Wkly Rep* 68:519-523.
- 446 8. Brecher ME, Hay SN. 2005. Bacterial contamination of blood components. *Clin*  
447 *Microbiol Rev* 18:195-204.
- 448 9. American Association of Blood Banks. 2003. Standard for blood banks and transfusion  
449 services, 22nd ed. AABB, Bethesda, MD.
- 450 10. American Association of Blood Banks. 2011. Standard for blood banks and transfusion  
451 services, 27th ed. AABB, Bethesda, MD.
- 452 11. U.S. Department of Health and Human Services; Food and Drug Administration; Center  
453 for Biologics Evaluation and Research. 2019. Bacterial risk control strategies for blood  
454 collection establishments and transfusion services to enhance the safety and availability  
455 of platelets for transfusion: guidance for industry. [https://www.fda.gov/regulatory-](https://www.fda.gov/regulatory-information/search-fda-guidance-documents/bacterial-risk-control-strategies-blood-collection-establishments-and-transfusion-services-enhance)  
456 [information/search-fda-guidance-documents/bacterial-risk-control-strategies-blood-](https://www.fda.gov/regulatory-information/search-fda-guidance-documents/bacterial-risk-control-strategies-blood-collection-establishments-and-transfusion-services-enhance)  
457 [collection-establishments-and-transfusion-services-enhance](https://www.fda.gov/regulatory-information/search-fda-guidance-documents/bacterial-risk-control-strategies-blood-collection-establishments-and-transfusion-services-enhance).
- 458 12. McDonald C, Allen J, Brailsford S, Roy A, Ball J, Moule R, Vasconcelos M, Morrison R,  
459 Pitt T. 2017. Bacterial screening of platelet components by National Health Service  
460 Blood and Transplant, an effective risk reduction measure. *Transfusion* 57:1122-1131.
- 461 13. Dunbar NM, Kreuter JD, Marx-Wood CR, Dumont LJ, Szczepiorkowski ZM. 2013.  
462 Routine bacterial screening of apheresis platelets on Day 4 using a rapid test: a 4-year  
463 single-center experience. *Transfusion* 53:2307-13.

- 464 14. Harm SK, Szczepiorkowski ZM, Dunbar NM. 2018. Routine use of Day 6 and Day 7  
465 platelets with rapid testing: two hospitals assess impact 1 year after implementation.  
466 *Transfusion* 58:938-942.
- 467 15. Bloch EM, Marshall CE, Boyd JS, Shifflett L, Tobian AAR, Gehrie EA, Ness PM. 2018.  
468 Implementation of secondary bacterial culture testing of platelets to mitigate residual risk  
469 of septic transfusion reactions. *Transfusion* 58:1647-1653.
- 470 16. Lin L, Wieseahn GP, Morel PA, Corash L. 1989. Use of 8-methoxypsoralen and long-  
471 wavelength ultraviolet radiation for decontamination of platelet concentrates. *Blood*  
472 74:517-25.
- 473 17. Lin L, Cook DN, Wieseahn GP, Alfonso R, Behrman B, Cimino GD, Corten L,  
474 Damonte PB, Dikeman R, Dupuis K, Fang YM, Hanson CV, Hearst JE, Lin CY, Londe  
475 HF, Metchette K, Nerio AT, Pu JT, Reames AA, Rheinschmidt M, Tessman J, Isaacs ST,  
476 Wollowitz S, Corash L. 1997. Photochemical inactivation of viruses and bacteria in  
477 platelet concentrates by use of a novel psoralen and long-wavelength ultraviolet light.  
478 *Transfusion* 37:423-35.
- 479 18. Corash L. 1999. Inactivation of viruses, bacteria, protozoa, and leukocytes in platelet  
480 concentrates: current research perspectives. *Transfus Med Rev* 13:18-30.
- 481 19. Wollowitz S. 2001. Fundamentals of the psoralen-based Helinx technology for  
482 inactivation of infectious pathogens and leukocytes in platelets and plasma. *Semin*  
483 *Hematol* 38:4-11.
- 484 20. Bethea D, Fullmer B, Syed S, Seltzer G, Tiano J, Rischko C, Gillespie L, Brown D,  
485 Gasparro FP. 1999. Psoralen photobiology and photochemotherapy: 50 years of science  
486 and medicine. *J Dermatol Sci* 19:78-88.

- 487 21. Ben-Hur E, Song P-S. 1984. The photochemistry and photobiology of furocoumarins  
488 (psoralens), p 131-171. *In* Lett JT (ed), *Advances in Radiation Biology*, vol 11. Elsevier.
- 489 22. Wollowitz S, Nerio AT. 2002. Psoralens for pathogen inactivation. US.
- 490 23. Wagner SJ, White R, Wolf L, Chapman J, Robinette D, Lawlor TE, Dodd RY. 1993.  
491 Determination of residual 4'-aminomethyl-4,5',8-trimethylpsoralen and mutagenicity  
492 testing following psoralen plus UVA treatment of platelet suspensions. *Photochem*  
493 *Photobiol* 57:819-24.
- 494 24. Lin L, Conlan MG, Tessman J, Cimino G, Porter S. 2005. Amotosalen interactions with  
495 platelet and plasma components: absence of neoantigen formation after photochemical  
496 treatment. *Transfusion* 45:1610-20.
- 497 25. U.S. Department of Health and Human Services FaDA, Center for Biologics Evaluation  
498 and Research,. 2014. December 18, 2014 Approval Letter - INTERCEPT Blood System  
499 for Platelets.
- 500 26. Cerus Corporation. INTERCEPT® Blood System for Plasma, SPC 00333-AW, v4.0.
- 501 27. Lanteri MC, Santa-Maria F, Laughhunn A, Girard YA, Picard-Maureau M, Payrat JM,  
502 Irsch J, Stassinopoulos A, Bringmann P. 2020. Inactivation of a broad spectrum of  
503 viruses and parasites by photochemical treatment of plasma and platelets using  
504 amotosalen and ultraviolet A light. *Transfusion* 60:1319-1331.
- 505 28. Lin L, Dikeman R, Molini B, Lukehart SA, Lane R, Dupuis K, Metzler P, Corash L. 2004.  
506 Photochemical treatment of platelet concentrates with amotosalen and long-wavelength  
507 ultraviolet light inactivates a broad spectrum of pathogenic bacteria. *Transfusion*  
508 44:1496-504.



- 509 29. Lin L, Hanson CV, Alter HJ, Jauvin V, Bernard KA, Murthy KK, Metzger P, Corash L.  
510 2005. Inactivation of viruses in platelet concentrates by photochemical treatment with  
511 amotosalen and long-wavelength ultraviolet light. *Transfusion* 45:580-90.
- 512 30. Friley JL, Stramer SL, Nambiar A, Moayeri M, Bakkour S, Langelier C, Crawford E, Lu  
513 T, Lanteri MC, Kamm J, Miller S, Wagner SJ, Benjamin RJ, Busch MP. 2020. Sepsis  
514 from an apheresis platelet contaminated with *Acinetobacter calcoaceticus/baumannii*  
515 complex bacteria and *Staphylococcus saprophyticus* after pathogen reduction.  
516 *Transfusion* 60:1960-1969.
- 517 31. Su CC, Yu EW. 2007. Ligand-transporter interaction in the AcrB multidrug efflux pump  
518 determined by fluorescence polarization assay. *FEBS Lett* 581:4972-6.
- 519 32. Hansen MT. 1982. Sensitivity of *Escherichia coli acrA* mutants to psoralen plus near-  
520 ultraviolet radiation. *Mutat Res* 106:209-16.
- 521 33. Clinical and Laboratory Standards Institute. 2015. Methods for Dilution Antimicrobial  
522 Susceptibility Tests for Bacteria that Grow Aerobically: Tenth Edition M07-A10. CLSI,  
523 Wayne, PA, USA, 2015.
- 524 34. Brennan-Krohn T, Kirby JE. 2019. Antimicrobial synergy testing by the inkjet printer-  
525 assisted automated checkerboard array and the manual time-kill method. *J Vis Exp*  
526 doi:10.3791/58636:e58636.
- 527 35. Brennan-Krohn T, Truelson KA, Smith KP, Kirby JE. 2017. Screening for synergistic  
528 activity of antimicrobial combinations against carbapenem-resistant Enterobacteriaceae  
529 using inkjet printer-based technology. *J Antimicrob Chemother* 72:2775-2781.

- 530 36. Smith KP, Dowgiallo MG, Chiaraviglio L, Parvatkar P, Kim C, Manetsch R, Kirby JE.  
531 2019. A whole-cell screen for adjunctive and direct antimicrobials active against  
532 carbapenem-resistant Enterobacteriaceae. *SLAS Discov* 24:842-853.
- 533 37. Smith KP, Kirby JE. 2016. Verification of an automated, digital dispensing platform for  
534 at-will broth microdilution-based antimicrobial susceptibility testing. *J Clin Microbiol*  
535 54:2288-93.
- 536 38. Lutgring JD, Machado MJ, Benahmed FH, Conville P, Shawar RM, Patel J, Brown AC.  
537 2018. FDA-CDC Antimicrobial Resistance Isolate Bank: a publicly available resource to  
538 support research, development, and regulatory requirements. *J Clin Microbiol* 56.
- 539 39. Valentine SC, Contreras D, Tan S, Real LJ, Chu S, Xu HH. 2008. Phenotypic and  
540 molecular characterization of *Acinetobacter baumannii* clinical isolates from nosocomial  
541 outbreaks in Los Angeles County, California. *J Clin Microbiol* 46:2499-2507.
- 542 40. Nikaido H, Pagès JM. 2012. Broad-specificity efflux pumps and their role in multidrug  
543 resistance of Gram-negative bacteria. *FEMS Microbiol Rev* 36:340-63.
- 544 41. Nishino K, Yamada J, Hirakawa H, Hirata T, Yamaguchi A. 2003. Roles of TolC-  
545 dependent multidrug transporters of *Escherichia coli* in resistance to beta-lactams.  
546 *Antimicrob Agents Chemother* 47:3030-3.
- 547 42. Yoon EJ, Courvalin P, Grillot-Courvalin C. 2013. RND-type efflux pumps in multidrug-  
548 resistant clinical isolates of *Acinetobacter baumannii*: major role for AdeABC  
549 overexpression and AdeRS mutations. *Antimicrob Agents Chemother* 57:2989-95.
- 550 43. Ruzin A, Keeney D, Bradford PA. 2007. AdeABC multidrug efflux pump is associated  
551 with decreased susceptibility to tigecycline in *Acinetobacter calcoaceticus*-*Acinetobacter*  
552 *baumannii* complex. *J Antimicrob Chemother* 59:1001-4.

- 553 44. Coyne S, Courvalin P, Périchon B. 2011. Efflux-mediated antibiotic resistance in  
554 *Acinetobacter* spp. *Antimicrob Agents Chemother* 55:947-53.
- 555 45. Sulavik MC, Houseweart C, Cramer C, Jiwani N, Murgolo N, Greene J, DiDomenico B,  
556 Shaw KJ, Miller GH, Hare R, Shimer G. 2001. Antibiotic susceptibility profiles of  
557 *Escherichia coli* strains lacking multidrug efflux pump genes. *Antimicrob Agents*  
558 *Chemother* 45:1126-36.
- 559 46. Fournier PE, Vallenet D, Barbe V, Audic S, Ogata H, Poirel L, Richet H, Robert C,  
560 Mangenot S, Abergel C, Nordmann P, Weissenbach J, Raoult D, Claverie JM. 2006.  
561 Comparative genomics of multidrug resistance in *Acinetobacter baumannii*. *PLoS Genet*  
562 2:e7.
- 563 47. Su C-C, Morgan CE, Kambakam S, Rajavel M, Scott H, Huang W, Emerson CC, Taylor  
564 DJ, Stewart PL, Bonomo RA, Yu EW. 2019. Cryo-electron microscopy structure of an  
565 *Acinetobacter baumannii* multidrug efflux pump. *mBio* 10:e01295-19.
- 566 48. Morgan CE, Glaza P, Leus IV, Trinh A, Su CC, Cui M, Zgurskaya HI, Yu EW. 2020.  
567 Cryo-EM structures of AdeB illuminate mechanisms of simultaneous binding and  
568 exporting of substrates. *mBio* 12:e03690-20.
- 569 49. Singh Y, Sawyer LS, Pinkoski LS, Dupuis KW, Hsu JC, Lin L, Corash L. 2006.  
570 Photochemical treatment of plasma with amotosalen and long-wavelength ultraviolet  
571 light inactivates pathogens while retaining coagulation function. *Transfusion* 46:1168-77.
- 572 50. Tsetsarkin KA, Sampson-Johannes A, Sawyer L, Kinsey J, Higgs S, Vanlandingham DL.  
573 2013. Photochemical inactivation of chikungunya virus in human apheresis platelet  
574 components by amotosalen and UVA light. *Am J Trop Med Hyg* 88:1163-9.

- 575 51. Stramer SL, Hollinger FB, Katz LM, Kleinman S, Metzler PS, Gregory KR, Dodd RY.  
576 2009. Emerging infectious disease agents and their potential threat to transfusion safety.  
577 *Transfusion* 49 Suppl 2:1s-29s.
- 578 52. Grellier P, Benach J, Labaied M, Charneau S, Gil H, Monsalve G, Alfonso R, Sawyer L,  
579 Lin L, Steiert M, Dupuis K. 2008. Photochemical inactivation with amotosalen and long-  
580 wavelength ultraviolet light of *Plasmodium* and *Babesia* in platelet and plasma  
581 components. *Transfusion* 48:1676-84.
- 582 53. Brennan-Krohn T, Manetsch R, O'Doherty GA, Kirby JE. 2020. New strategies and  
583 structural considerations in development of therapeutics for carbapenem-resistant  
584 Enterobacteriaceae. *Transl Res* 220:14-32.
- 585 54. Richter MF, Drown BS, Riley AP, Garcia A, Shirai T, Svec RL, Hergenrother PJ. 2017.  
586 Predictive compound accumulation rules yield a broad-spectrum antibiotic. *Nature*  
587 545:299-304.
- 588 55. Magnet S, Courvalin P, Lambert T. 2001. Resistance-nodulation-cell division-type efflux  
589 pump involved in aminoglycoside resistance in *Acinetobacter baumannii* strain BM4454.  
590 *Antimicrob Agents Chemother* 45:3375-80.
- 591 56. Long F, Rouquette-Loughlin C, Shafer WM, Yu EW. 2008. Functional cloning and  
592 characterization of the multidrug efflux pumps NorM from *Neisseria gonorrhoeae* and  
593 YdhE from *Escherichia coli*. *Antimicrob Agents Chemother* 52:3052-60.
- 594 57. Telke AA, Olaitan AO, Morand S, Rolain J-M. 2017. *soxRS* induces colistin hetero-  
595 resistance in *Enterobacter asburiae* and *Enterobacter cloacae* by regulating the *acrAB-*  
596 *tolC* efflux pump. *J Antimicrob Chemother* 72:2715-2721.

- 597 58. Swick MC, Morgan-Linnell SK, Carlson KM, Zechiedrich L. 2011. Expression of  
598 multidrug efflux pump genes *acrAB-tolC*, *mdfA*, and *norE* in *Escherichia coli* clinical  
599 isolates as a function of fluoroquinolone and multidrug resistance. *Antimicrob Agents*  
600 *Chemother* 55:921-924.
- 601 59. Grimsey EM, Weston N, Ricci V, Stone JW, Piddock LJV. 2020. Overexpression of  
602 *ramA*, which regulates production of the multidrug resistance efflux pump AcrAB-TolC,  
603 increases mutation rate and influences drug resistance phenotype. *Antimicrob Agents*  
604 *Chemother* 64:e02460-19.
- 605 60. Keeney D, Ruzin A, McAleese F, Murphy E, Bradford PA. 2007. MarA-mediated  
606 overexpression of the AcrAB efflux pump results in decreased susceptibility to  
607 tigecycline in *Escherichia coli*. *J Antimicrob Chemother* 61:46-53.
- 608 61. Eaves DJ, Ricci V, Piddock LJV. 2004. Expression of *acrB*, *acrF*, *acrD*, *marA*, and *soxS*  
609 in *Salmonella enterica* Serovar Typhimurium: Role in Multiple Antibiotic Resistance.  
610 *Antimicrob Agents Chemother* 48:1145-1150.
- 611 62. Ferrari RG, Galiana A, Cremades R, Rodríguez JC, Magnani M, Tognim MCB, Oliveira  
612 TCRM, Royo G. 2013. Expression of the *marA*, *soxS*, *acrB* and *ramA* genes related to the  
613 AcrAB/TolC efflux pump in *Salmonella enterica* strains with and without quinolone  
614 resistance-determining regions *gyrA* gene mutations. *Braz J Infect Dis* 17:125-130.
- 615 63. Opperman T, Nguyen S. 2015. Recent advances toward a molecular mechanism of efflux  
616 pump inhibition. *Frontiers in Microbiology* 6.
- 617 64. Padilla E, Llobet E, Doménech-Sánchez A, Martínez-Martínez L, Bengoechea JA,  
618 Albertí S. 2010. *Klebsiella pneumoniae* AcrAB efflux pump contributes to antimicrobial  
619 resistance and virulence. *Antimicrob Agents Chemother* 54:177-83.

- 620 65. Leus IV, Weeks JW, Bonifay V, Smith L, Richardson S, Zgurskaya HI. 2018. Substrate  
621 specificities and efflux efficiencies of RND efflux pumps of *Acinetobacter baumannii*. J  
622 Bacteriol 200.
- 623 66. Krishnamoorthy G, Weeks JW, Zhang Z, Chandler CE, Xue H, Schweizer HP, Ernst RK,  
624 Zgurskaya HI. 2019. Efflux pumps of *Burkholderia thailandensis* control the  
625 permeability barrier of the outer membrane. Antimicrob Agents Chemother 63:e00956-  
626 19.
- 627 67. Li X-Z, Plésiat P, Nikaido H. 2015. The challenge of efflux-mediated antibiotic  
628 resistance in Gram-negative bacteria. Clin Microbiol Rev 28:337-418.
- 629 68. Zhang L, Li XZ, Poole K. 2000. Multiple antibiotic resistance in *Stenotrophomonas*  
630 *maltophilia*: involvement of a multidrug efflux system. Antimicrob Agents Chemother  
631 44:287-93.
- 632 69. Argyraki A, Markvart M, Stavnsbjerg C, Kragh KN, Ou Y, Bjørndal L, Bjarnsholt T,  
633 Petersen PM. 2018. UV light assisted antibiotics for eradication of in vitro biofilms. Sci  
634 Rep 8:16360.
- 635 70. Kvam E, Benner K. 2020. Mechanistic insights into UV-A mediated bacterial  
636 disinfection via endogenous photosensitizers. J Photochem Photobiol B 209:111899.
- 637 71. Cerus Corporation. 2019. INTERCEPT® Blood System for Plasma, SPC 00818-AW,  
638 DRAFT v0.1. <https://www.fda.gov/media/90594/download>. Accessed November 4.
- 639 72. Hauser L, Roque-Afonso AM, Beylouné A, Simonet M, Deau Fischer B, Burin des  
640 Roziers N, Mallet V, Tiberghien P, Bierling P. 2014. Hepatitis E transmission by  
641 transfusion of Intercept blood system-treated plasma. Blood 123:796-7.

- 642 73. Gallian P, Pouchol E, Djoudi R, Lhomme S, Mouna L, Gross S, Bierling P, Assal A,  
643 Kamar N, Mallet V, Roque-Afonso AM, Izopet J, Tiberghien P. 2019. Transfusion-  
644 Transmitted Hepatitis E Virus Infection in France. *Transfus Med Rev* 33:146-153.
- 645 74. Levy JH, Neal MD, Herman JH. 2018. Bacterial contamination of platelets for  
646 transfusion: strategies for prevention. *Crit Care* 22:271.
- 647 75. Baba T, Ara T, Hasegawa M, Takai Y, Okumura Y, Baba M, Datsenko KA, Tomita M,  
648 Wanner BL, Mori H. 2006. Construction of *Escherichia coli* K-12 in-frame, single-gene  
649 knockout mutants: the Keio collection. *Mol Syst Biol* 2:2006.0008.
- 650 76. Miyamae S, Ueda O, Yoshimura F, Hwang J, Tanaka Y, Nikaido H. 2001. A MATE  
651 family multidrug efflux transporter pumps out fluoroquinolones in *Bacteroides*  
652 *thetaitotaomicron*. *Antimicrob Agents Chemother* 45:3341-3346.
- 653 77. Lynch MD, Gill RT. 2006. Broad host range vectors for stable genomic library  
654 construction. *Biotechnol Bioeng* 94:151-8.
- 655 78. Kang YS, Kirby JE. 2017. Promotion and Rescue of Intracellular *Brucella neotomae*  
656 Replication during Coinfection with *Legionella pneumophila*. *Infect Immun* 85.
- 657 79. Shcherbakova DM, Hink MA, Joosen L, Gadella TW, Verkhusha VV. 2012. An orange  
658 fluorescent protein with a large Stokes shift for single-excitation multicolor FCCS and  
659 FRET imaging. *J Am Chem Soc* 134:7913-23.
- 660 80. Chung CT, Niemela SL, Miller RH. 1989. One-step preparation of competent *Escherichia*  
661 *coli*: transformation and storage of bacterial cells in the same solution. *Proc Natl Acad*  
662 *Sci U S A* 86:2172-5.

- 663 81. Brennan-Krohn T, Kirby JE. 2019. Antimicrobial Synergy Testing by the Inkjet Printer-  
664 assisted Automated Checkerboard Array and the Manual Time-kill Method. *J Vis Exp*  
665 doi:10.3791/58636.
- 666 82. Sugawara E, Nikaido H. 2014. Properties of AdeABC and AdeIJK efflux systems of  
667 *Acinetobacter baumannii* compared with those of the AcrAB-TolC system of *Escherichia*  
668 *coli*. *Antimicrob Agents Chemother* 58:7250-7.
- 669 83. Murakami S, Nakashima R, Yamashita E, Matsumoto T, Yamaguchi A. 2006. Crystal  
670 structures of a multidrug transporter reveal a functionally rotating mechanism. *Nature*  
671 443:173-9.
- 672 84. Vargiu AV, Nikaido H. 2012. Multidrug binding properties of the AcrB efflux pump  
673 characterized by molecular dynamics simulations. *Proc Natl Acad Sci U S A* 109:20637-  
674 42.
- 675 85. Lyu M, Moseng MA, Reimche JL, Holley CL, Dhulipala V, Su C-C, Shafer WM, Yu  
676 EW. 2020. Cryo-EM structures of a gonococcal multidrug efflux pump illuminate a  
677 mechanism of drug recognition and resistance. *mBio* 11:e00996-20.
- 678  
679



680 **Table I. Minimal inhibitory concentration of amotosalen on ATCC quality control strains**  
681 **and multidrug-resistant clinical strains**

682

683

| Species                      | Strains Tested | Modal MIC ( $\mu\text{M}$ ) <sup>a</sup> | MIC Range ( $\mu\text{M}$ ) |
|------------------------------|----------------|------------------------------------------|-----------------------------|
| <i>E. coli</i> 25922         | -              | 8                                        | -                           |
| <i>E. coli</i> strains       | 8              | 128                                      | 64-256                      |
| <i>K. pneumoniae</i> 13882   | -              | 32, 64 <sup>b</sup>                      | -                           |
| <i>K. pneumoniae</i> strains | 8              | 128                                      | 128-256                     |
| <i>A. baumannii</i> 17978    | -              | 128                                      | -                           |
| <i>A. baumannii</i> strains  | 17             | 128                                      | 64-256                      |

684

685

686 <sup>a</sup>Modal MIC (minimal inhibitory concentration) for individual strains determined from values  
687 obtained from 3 separate experiments with two technical replicates per experiment. Modal MIC  
688 value for groups of strains were determined from the modal MIC values of the individual strains  
689 represented.

690 <sup>b</sup>Equal number of replicates showed MIC of levels of 32 and 64  $\mu\text{M}$ .

691 **Tables II. Effect of a *ΔtolC* deletion, inactivating RND efflux pumps in *E. coli*, on the**  
692 **minimal inhibitor concentration of psoralens.**

693

| <b>Psoralen<sup>a</sup></b> | <b>Strain<sup>b</sup></b> | <b>MIC (μM)<sup>c</sup></b> |
|-----------------------------|---------------------------|-----------------------------|
| Amotosalen                  | wt                        | 32                          |
| Amotosalen                  | <i>ΔtolC</i>              | 2                           |
| 8-MOP                       | wt                        | 128                         |
| 8-MOP                       | <i>ΔtolC</i>              | 32                          |
| AMT                         | wt                        | 32                          |
| AMT                         | <i>ΔtolC</i>              | 8                           |

694

695 <sup>a</sup>8-MOP = 8-methoxypsoralen; AMT = 4'-aminomethyltrioxsalen hydrochloride

696 <sup>b</sup>*Escherichia coli* Keio wild type (wt) strain and isogenic *ΔtolC* mutant that cannot produce  
697 functional RND (resistance-nodulation-division) efflux transporters due to the absence of the  
698 required TolC outer membrane component.

699 <sup>c</sup>Modal MIC (minimal inhibitory concentration) for individual strains determined from values  
700 obtained from at least 3 separate experiments with two technical replicates per experiment.

701

702 **Table III. Effect of a heterologously expressed AdeABC efflux pump from *A. baumannii***  
703 **on minimal inhibitor concentration of psoralens in *E. coli*.**

704

| <b>Psoralen Compound</b> | <b>Efflux Pump Strain<sup>a</sup></b> | <b>MIC (<math>\mu</math>M)<sup>b</sup></b> |
|--------------------------|---------------------------------------|--------------------------------------------|
| Amotosalen               | pAdeAB + pAdeC                        | 256                                        |
| Amotosalen               | pAdeC                                 | 8                                          |
| 8-MOP                    | pAdeAB + pAdeC                        | 128                                        |
| 8-MOP                    | pAdeC                                 | 16                                         |
| AMT                      | pAdeAB + pAdeC                        | 256                                        |
| AMT                      | pAdeC                                 | 8                                          |

705

706 <sup>a</sup>*E. coli* strain AG100AX lacking major endogenous *E. coli* RND efflux pumps ( $\Delta$ *acrAB*  
707  $\Delta$ *acrDE*) was transformed with plasmids expressing the indicated *A. baumannii* AdeABC efflux  
708 pump components under inducing conditions.

709 <sup>b</sup>Modal MIC (minimal inhibitory concentration) for individual strains determined from values  
710 obtained from at least 3 separate experiments with two technical replicates per experiment.

711

## 712 **Figure Legends**

713

### 714 **Figure 1. Binding affinity of amotosalen and AdeB determined using fluorescence**

715 **polarization.** Indicated concentrations of AdeB were mixed with 3 $\mu$ M amotosalen. The change  
716 in fluorescence polarization signal ( $\Delta$ FP) indicates a  $K_D$  of 27.9 $\pm$ 1.8  $\mu$ M for amotosalen.

717

### 718 **Figure 2. Modeling of amotosalen binding to AdeB.** Two amotosalen docking sites were

719 identified in the periplasmic domain of the recently determined cryo-EM structure of AdeB (48)  
720 using Induced Fit Docking and XP scores for ranking. The sites are within the hydrophobic cleft  
721 between PC1 and PC2 subdomains in AdeB that are thought to form the entry site and pathway  
722 for efflux from the periplasm (47). Amotosalen is predicted to bind proximal and distal drug  
723 binding sites, as previously defined through autodocking and experimental analysis of antibiotic  
724 efflux substrates for AdeB and homologous RND transporters.(47, 83, 84) Specifically, critical  
725 contacts are made with hydrophilic residue D664 in the PAIDELGT sequence defined “F-Loop”  
726 which forms both part of the cleft entrance and the proximal drug binding site. Amotosalen also  
727 binds to the distal multidrug binding site inclusive of hydrophobic interactions with F178, I607  
728 and W610. This hydrophobic patch in the homologous AcrB is critical for stable binding of all  
729 substrates, and is further highlighted in corresponding residue interactions in the AcrB-  
730 minocycline crystal structure and corresponding MtrD-erythromycin cryo-EM structure (47, 83-  
731 85). The predicted binding affinities (XP scores) to the two sites are -10.63 and -11.66,  
732 respectively.

733

734 **Figure 3. Chemical structures of amotosalen, AMT, and 8-MOP.** These related psoralens  
735 share a core planar structure with few rotatable bounds. However, amotosalen and 4'-  
736 aminomethyltrioxsalen (AMT) also contain primary amino groups, which when combined with  
737 molecular planarity and small numbers of rotatable bonds, are associated with enhanced  
738 penetrance into Gram-negative pathogens (54). Therefore, structural properties appear to explain  
739 the observed enhanced activity of amotosalen and AMT compared with 8-MOP.

740

741

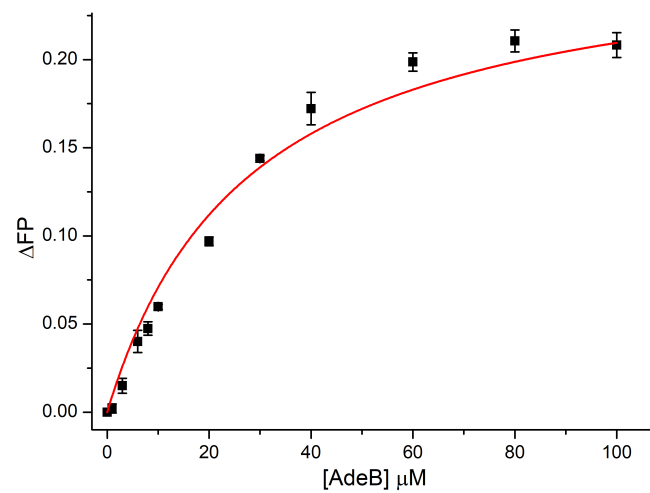

**Figure 1. Binding affinity of amotosalen and AdeB determined using fluorescence polarization.** Indicated concentrations of AdeB were mixed with 3μM amotosalen. The change in fluorescence polarization signal ( $\Delta$ FP) indicates a KD of  $27.9 \pm 1.8$  μM for amotosalen.

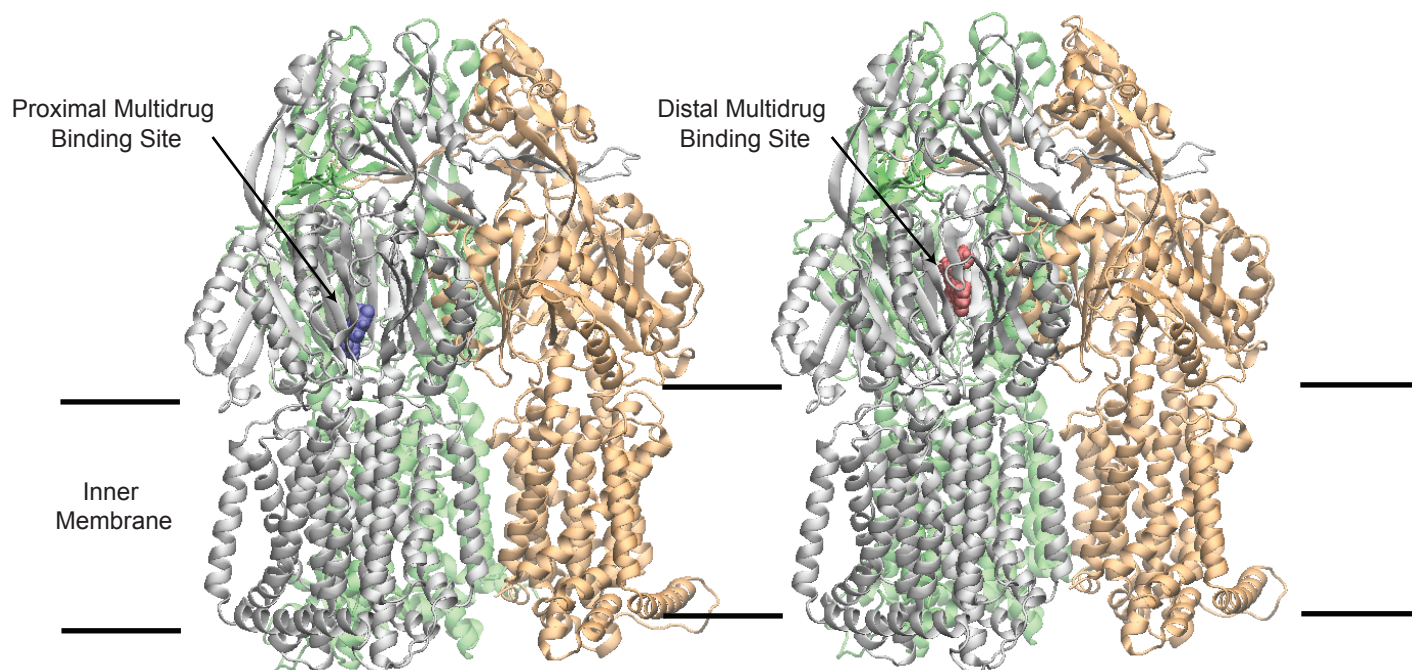

**Figure 2. Modeling of amotosalen binding to AdeB.** Two amotosalen docking sites were identified in the periplasmic domain of the recently determined cryo-EM structure of AdeB (48) using Induced Fit Docking and XP scores for ranking. The sites are within the hydrophobic cleft between PC1 and PC2 subdomains in AdeB that are thought to form the entry site and pathway for efflux from the periplasm (47). Amotosalen is predicted to bind proximal and distal drug binding sites, as previously defined through autodocking and experimental analysis of antibiotic efflux substrates for AdeB and homologous RND transporters.(47, 83, 84) Specifically, critical contacts are made with hydrophilic residue D664 in the PAIDELGT sequence defined “F-Loop” which forms both part of the cleft entrance and the proximal drug binding site. Amotosalen also binds to the distal multidrug binding site inclusive of hydrophobic interactions with F178, I607 and W610. This hydrophobic patch in the homologous AcrB is critical for stable binding of all substrates, and is further highlighted in corresponding residue interactions in the AcrB-minocycline crystal structure and corresponding MtrD-erythromycin cryo-EM structure (47, 83-85). The predicted binding affinities (XP scores) to the two sites are -10.63 and -11.66, respectively.

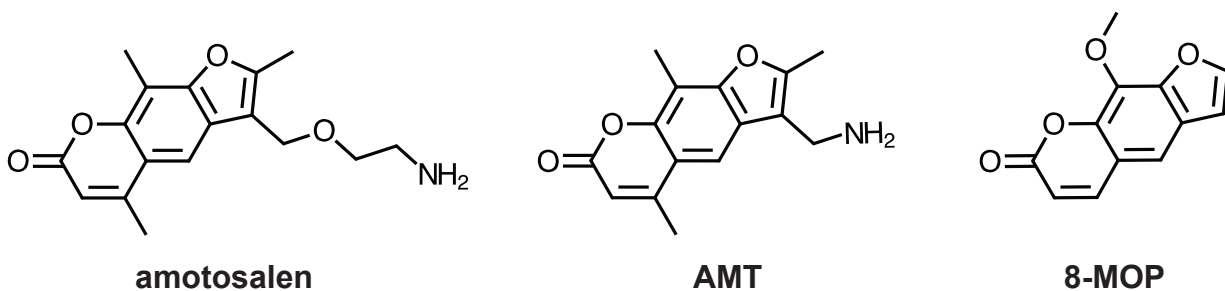

**Figure 3. Chemical structures of amotosalen, AMT, and 8-MOP.** These related psoralens share a core planar structure with few rotatable bounds. However, amotosalen and 4'-aminomethyltrioxsalen (AMT) also contain primary amino groups, which when combined with molecular planarity and small numbers of rotatable bonds, are associated with enhanced penetrance into Gram-negative pathogens (54). Therefore, structural properties appear to explain the observed enhanced activity of amotosalen and AMT compared with 8-MOP.
